1 Quantification of Optical Coherence  
2 Tomography Angiography in Age and Age-  
3 related Macular Degeneration using Vessel  
4 Density analysis

5

6 **Ehsan Vaghefi, PhD<sup>1,2</sup>, Sophie Hill, MD<sup>3</sup>, Hannah M Kersten, PhD<sup>1</sup>, David**  
7 **Squirrell, FRANZCO<sup>3</sup>**

8 1- School of Optometry and Vision Science, University of Auckland, New  
9 Zealand

10 2- Auckland Bioengineering Institute, University of Auckland, New Zealand

11 3- Department of Ophthalmology, University of Auckland, New Zealand

12

13 \* Corresponding Author

14 Dr Ehsan Vaghefi

15 85 Park Rd, Grafton

16 School of Optometry and Vision Science

17 University of Auckland, Auckland

18 New Zealand

19 E: [e.vaghefi@auckland.ac.nz](mailto:e.vaghefi@auckland.ac.nz)

20 P: +64 9 9231036

21 This work was funded by Faculty Research Development fund, The University of

22 Auckland.

23 None of the authors of this manuscript has a proprietary interest to declare.

24 **Keywords:** Age-related Macular Degeneration, Optical Coherence Tomography

25 Angiography, Retinal Blood Flow, Vessel Density

26

27 Word Count: 3768

28

29 **Brief Summary**

30 In this manuscript, we have studied the potential of retinal vessel density as

31 measured by optical coherence tomography angiography (OCT-A), as a biomarker

32 for detection of high-risk of developing exudative age-related macular degeneration

33 (AMD).

34

35 **Abstract**

36 **Purpose**

37 To determine whether vessel density (VD) as measured by optical coherence tomography  
38 angiography (OCT-A) provide insights into retinal and choriocapillaris vascular changes with  
39 ageing and intermediate dry age related macular degeneration (AMD).

40 **Methods**

41 Seventy-five participants were recruited into three cohorts; young healthy (YH) group, old healthy  
42 (OH) and those at high-risk for exudative AMD. Raw OCT and OCT-A data from TOPCON DRI  
43 OCT Triton were exported using Topcon IMAGENET 6.0 software, and 3D datasets were  
44 analysed to determine retinal thickness and vessel density.

45 **Results**

46 Central macular thickness measurements revealed a trend of overall retinal thinning with  
47 increasing age. VD through the full thickness of the retina was highest in ETDRS sector 4 (the  
48 inferior macula) in all the cohorts. Mean VD was significantly higher in the deep capillary plexus  
49 than the superficial capillary plexus in all ETDRS sectors in all cohorts but there was no  
50 significant difference noted between groups. Choriocapillaris VD was significantly lower in all  
51 ETDRS sectors in the in the AMD group compared with the YH and the OH groups.

52 **Conclusions**

53 Retinal vessel density maps, derived from the retinal plexi are not reliable biomarkers for  
54 assessing the ageing macular. Our non-proprietary analysis of the vascular density of the  
55 choriocapillaris revealed a significant drop off of VD with age and disease but further work is  
56 required to corroborate this finding. If repeatable, choriocapillaris VD may provide a non-invasive  
57 biomarker of healthy ageing and disease.

## 58 **Introduction**

59 Currently we lack a reliable, non-invasive vascular biomarker to monitor both the “healthy”  
60 ageing and disease progression of age related macular degeneration (AMD). Optical  
61 coherence tomography angiography (OCT-A) represents a novel, non-invasive, dye-less  
62 retinal vascular imaging technique that can be rapidly acquired during a clinical consultation.  
63 OCT-A is a progression of OCT, using repeated B-scans to detect motion contrast<sup>1</sup>. Based  
64 on the assumption that this represents the movement of erythrocytes travelling through the  
65 retinal blood vessels, the retinal vasculature can therefore be visualised.<sup>2</sup> Previous studies  
66 have shown the value of this imaging technique in the evaluation of glaucoma, diabetic  
67 retinopathy (DR), retinal vein occlusions and AMD<sup>3</sup>.

68 The laminar structure of the retina lends itself to segmentation analysis. Histologically, the  
69 retina has four retinal capillary plexuses, within the macular only three of these are  
70 considered; the superficial, deep and intermediate capillary plexuses<sup>4, 5</sup>. When the macular  
71 vasculature is imaged using OCT-A the vascular layers are segmented automatically by the  
72 software. This results in the merging of the intermediate with the deep capillary plexus<sup>3</sup>. The  
73 regions of interest identified on the OCT-A therefore include the superficial capillary plexus  
74 (SCP) and the deep capillary plexus (DCP)<sup>3</sup>. The SCP consists of the vasculature within the  
75 retinal nerve fibre layer (RNFL) and ganglion cell layer (GCL). The DCP represents the  
76 vascular plexuses present at two locations: These plexuses are at the border of the inner  
77 nuclear layer and the outer plexiform layer, and the border of the inner plexiform layer and  
78 inner nuclear layer<sup>6</sup>.

79 OCT-A images can be subjectively appraised for the presence of disease or post processed  
80 to produce quantitative data that can be evaluated objectively. A number of studies<sup>7, 8</sup> have  
81 used perfusion indices such as vessel density and flow index<sup>9</sup> as a method of quantitatively  
82 analysing OCT-A images. Vessel density is defined as the “percentage area occupied by  
83 vessels in the segmented area”<sup>9</sup>. Flow index is defined as “the average decorrelation values  
84 in the segmented area”<sup>9</sup>. It has been proposed that these indices could be of value in

85 monitoring disease progression in AMD and DR<sup>7, 10, 11</sup>. When measuring vessel density, both  
86 vessel length and diameter need to be considered. Poor perfusion can also result in vessel  
87 dilation, therefore vessel density may not give complete information about the retinal  
88 vascular status<sup>12</sup>.

89 There are a wide range of OCT-A devices available, each using a variety of algorithms to  
90 capture retinal images. These include OCT-based optical micro-angiography (OMAG); split-  
91 spectrum amplitude decorrelation angiography (SSADA); OCT angiography ratio analysis  
92 (OCT-ARA); speckle variance; phase variance; and correlation mapping<sup>13</sup>. Specific OCT-A  
93 models such as the AngioVue (Optovue, Inc., Fremont, CA, USA) have inbuilt software for  
94 perfusion indices calculation<sup>14</sup>. However, the majority of studies have applied post image  
95 analysis in a variety of methods after the images are exported from the OCT-A instrument<sup>2</sup>.

96 This heterogeneity in the image capture and analysis means that data calculated using  
97 different algorithms are not directly comparable, due to systemic difference and poor  
98 agreement<sup>2</sup>. Therefore, external normative databases are unreliable and longitudinal  
99 monitoring of disease using vessel density requires scans to be performed using the same  
100 instrument, scan location and algorithm<sup>2</sup>.

101 The aims of this study are to compare the macular vessel density values for; young healthy,  
102 old healthy, and patients with intermediate dry age related macular degeneration at high risk  
103 of progression to exudative AMD, and to determine if these perfusion indices could usefully  
104 serve as a biomarker for both “healthy” ageing and the identification of disease risk.

105

106

107

108

109

## 110 **Materials and Methods**

111 Seventy-five participants were recruited through Auckland Optometry Clinic and Milford Eye  
112 Clinic, Auckland, New Zealand. All participants provided written informed consent prior to  
113 imaging. Ethics approval (#018241) from the University of Auckland Human Participants Ethics  
114 Committee was obtained for this study. This research adhered to the tenets of the Declaration of  
115 Helsinki.

116 Participants were divided into three groups, young healthy (YH) group, old healthy (OH) group  
117 and the high-risk intermediate AMD group. Twenty participants were recruited into the YH group,  
118 twenty-one were recruited into the OH group, and thirty-four recruited into the AMD group. A  
119 comprehensive eye exam was conducted on each participant prior to the OCT and OCT-A scans  
120 in order to determine high contrast BCVA and the ocular health status of the fundus. Patients  
121 with any posterior eye disease that could potentially affect the choroidal or retinal vasculature  
122 including, but not limited to glaucoma, polypoidal choroidal vasculopathy, DR, hypertensive  
123 retinopathy, and high myopia ( $\geq 6D$ ), were excluded from the study. Patients with any history of  
124 neurological disorders were also excluded. The Young Healthy group consisted entirely of  
125 individuals between the ages of 20 and 26 and a best corrected visual acuity of  $\geq 6/9$  in the eye  
126 under test. The “Old Healthy” group consisted of individuals over the age of 55 years and who  
127 had and a best corrected visual acuity of  $\geq 6/9$  in the eye under test. The “AMD group” consisted  
128 entirely of patients with high risk intermediate dry AMD. This being diagnosed if the individual  
129 had at least two of the following risk factors; reticular pseudodrusen, established neovascular  
130 AMD in the fellow eye, confluent soft drusen with accompanying changes within the retinal  
131 pigment epithelium. In order to ensure that all patients in the “AMD cohort” could maintain  
132 fixation during OCT-A imaging, only those patients with a best-corrected visual acuity (BCVA) of  
133 6/15 or better were enrolled. The mean age of the participants in the YH group, OH and AMD  
134 participants were  $23 \pm 3$ ,  $65 \pm 10$  and  $75 \pm 8$  years respectively. Only one eye of each patient  
135 was used for the analysis, and if the patient had both eyes scanned, the OCT-A scan that was  
136 the better quality (assessed subjectively by the clinical grader) of the two was used. Mean best-  
137 corrected visual acuity for the YH, OH and AMD group were 6/6, 6/9, and 6/12 respectively.

138 The ocular health of all participants was assessed at Auckland Optometry Clinic, by a registered  
139 optometrist, prior to enrolment in the study. The macular status of patients enrolled into the AMD  
140 group was assessed separately by an experienced retinal specialist (DS).

141

#### 142 **Data collection protocol**

143 Participants were dilated with 1.0% tropicamide if the pupils were deemed to be too small for  
144 adequate OCT scans. Intraocular pressures were measured before and after dilation by iCare  
145 tonometry. OCT/OCT-A scans, fundus photography and clinical measurements were all  
146 performed at the University of Auckland Optometry Clinic, in a single session.

147

#### 148 **SS-OCT-A device and scanning protocol**

149 The swept source OCT-A device (Topcon DRI OCT Triton, Topcon Corporation, Japan) was  
150 used to obtain the OCT and OCT-A scans. A macular line and 3x3mm<sup>2</sup> OCT, and 3x3mm<sup>2</sup> OCT-  
151 A scan were performed on each participant. All scans were centered on the fovea, and retinal  
152 layers were identified using the IMAGENET 6.0 automated layer detection tool so that the  
153 superficial (SCP) and deep (DCP) capillary plexuses could be evaluated. The quality of the  
154 generated layers were checked manually. Scan quality was evaluated at the time of acquisition,  
155 and repeated if required.

156

#### 157 **Quantitative analysis of OCT-A Images**

158 Raw OCT and OCT-A data were exported using Topcon IMAGEnet 6.0 software. Since OCT-A  
159 images are only qualitative, we chose to normalize the OCT-A datasets, prior to further analysis.  
160 These datasets were then correlated with vessel density in each retinal sector. OCT-A 3D  
161 datasets were analysed in three different ways (outlined below), to investigate the retinal and  
162 choroidal thickness and vessel density (VD).

163

#### 164 **1. ETDRS-specific**

165 The nine Early Treatment Diabetic Retinopathy Study (ETDRS) sectors were computationally  
166 generated and centred manually by the clinical examiner, on the fovea (using enface OCT-A) for

167 each participant. In some instances, the macular region was not in the centre of the enface  
168  $3 \times 3 \text{mm}^2$  OCT-A scan. Hence, after manual adjustment of the ETDRS central positioning on the  
169 fovea, the outer ETDRS regions (i.e. 6-9) could have been positioned outside of the imaging  
170 area. Therefore, in this study in which we were interested in assessing the role vessel density may  
171 play as a potential biomarker for ageing and disease of the central macular, we only used  
172 ETDRS regions 1 to 5 for consistency in our analysis. In this process, the OCT-A signal is  
173 extracted and saved for each ETDRS region, superimposed on every OCT-A enface layer. In  
174 other words, all the  $3 \times 3 \text{mm}^2$  OCT-A layers through the retinal thickness are combined to create  
175 an OCT-A volume dataset, 920 of them per  $3 \times 3 \text{mm}^2$  scan, using the Topcon DRI OCT. Finally,  
176 the ETDRS regions are manually applied to each of the 920 enface OCT-A images and OCT-A  
177 normalized data per region are extracted (see Figure 1). This method has been recently  
178 published<sup>15</sup>. The averaged normalized vessel density (VD) of the full thickness retina and  
179 choriocapillaris of each ETDRS region was then extracted from every participant for further  
180 analysis. Normalisation was performed by converting the raw data to percentage of VD in all  
181 ETDRS regions, throughout the thickness of the retina.

182

## 183 **2. SCP, DCP and Choriocapillaris**

184 Using the same ETDRS regions as above, the VD was extracted from layer 1 and 2 for the SCP  
185 calculation, layers 3 and 4 for the DCP and layer 8 for the choriocapillaris. Averaged normalized  
186 VD from the SCP, DCP and choriocapillaris was then extracted for each participant, in the three  
187 groups.

188

## 189 **3. Retinal and choroidal thickness**

190 In addition to OCT-A data, we also recorded the foveal thickness and subfoveal choroidal  
191 thickness from the OCT B-scans.

192

## 193 **Statistical analysis**

194 MATLAB programming software and custom-written code was used to import and analyse the  
195 data, as detailed above. Statistical analysis was performed using MATLAB Statistics Toolbox.



196 Due to unequal sample sizes between the sample groups, we performed the two sample non-  
197 parametric Kolmogorov and Smirnov test, which is one of the most general nonparametric  
198 methods for comparing two samples. The Kolmogorov and Smirnov method assumes that the  
199 data in both groups follow Gaussian distributions. Significant differences between groups were  
200 defined as  $D < 0.565$  for the Kolmogorov and Smirnov test.  
201

202 **Results**

203

204 **Mean age, central macular thickness, and foveal avascular zone diameter.**

205 Seventy-five participants were included in this study of which 20 were in the Young Healthy  
206 group ( $23 \pm 3$  years old), 21 in the Old Healthy group, ( $65 \pm 10$  years old) and 34 in the AMD  
207 group ( $75 \pm 8$  years old). OCT data was segmented by IMAGEnet 6.0 software, and the mean  
208 central macular thickness measurements for the three participating cohorts was extracted: YH  
209  $217.4 \pm 9.28$   $\mu\text{m}$ , OH  $209.8 \pm 6.13$   $\mu\text{m}$ , AMD  $174.2 \pm 20.3$   $\mu\text{m}$ . Horizontal diameter of the foveal  
210 avascular zone (FAZ) was also measured from each OCT and mean FAZ measurements were  
211 calculated: YH  $672.5 \pm 73.4$   $\mu\text{m}$ , OH  $577.7 \pm 98.8$   $\mu\text{m}$ , AMD  $639 \pm 126.2$   $\mu\text{m}$ .

212 **Vessel density measurements: Full retinal thickness.**

| <b>ETDRS Sectors</b>          | <b>Foveal % (1)</b>              | <b>Superior % (2)</b>            | <b>Nasal % (3)</b>               | <b>Inferior % (4)</b>            | <b>Temporal % (5)</b>            |
|-------------------------------|----------------------------------|----------------------------------|----------------------------------|----------------------------------|----------------------------------|
| <b>Young Healthy<br/>n=20</b> | <b><math>7.5 \pm 6.6</math></b>  | <b><math>18.1 \pm 7.3</math></b> | <b><math>16.0 \pm 7.0</math></b> | <b><math>20.5 \pm 8.3</math></b> | <b><math>18.2 \pm 8.1</math></b> |
| <b>Old</b>                    | <b><math>14.7 \pm 9.8</math></b> | <b><math>21.1 \pm 8.3</math></b> | <b><math>20.8 \pm 9.9</math></b> | <b><math>21.5 \pm 11</math></b>  | <b><math>21.1 \pm 9.6</math></b> |

213 *Table 1: Mean Vessel Density from full retinal thickness per ETDRS Sector, for each group.*

|                               |                  |                  |                  |                  |                  |
|-------------------------------|------------------|------------------|------------------|------------------|------------------|
| <b>Healthy</b><br><b>n=21</b> |                  |                  |                  |                  |                  |
| <b>AMD</b><br><b>n=34</b>     | <b>29.6±19.8</b> | <b>48.5±31.4</b> | <b>43.8±31.9</b> | <b>47.7±27.9</b> | <b>48.6±24.8</b> |

  

|                                |                     |                       |                    |                       |                       |
|--------------------------------|---------------------|-----------------------|--------------------|-----------------------|-----------------------|
| <b>ETDRS</b><br><b>Sectors</b> | <b>Foveal % (1)</b> | <b>Superior % (2)</b> | <b>Nasal % (3)</b> | <b>Inferior % (4)</b> | <b>Temporal % (5)</b> |
|--------------------------------|---------------------|-----------------------|--------------------|-----------------------|-----------------------|

214

215 Table 1 shows the mean VD throughout the **full retinal thickness**, for each ETDRS sector. In  
 216 all groups the highest VD was found in sector 4, the inferior macula. Lowest vessel density in all  
 217 groups was in sector 1 the foveal/parafoveal region. A statistical difference between the vessel  
 218 density in Sector 1 was found between all the groups, with the vessel density being higher in the  
 219 AMD cohort (29.6±19.8) compared to the Young Healthy (7.5±6.6) and Old healthy groups  
 220 (14.7±9.68). Analysis of the vessel density of ETDRS sectors 2-5, revealed that there was a  
 221 statistical difference in the VD between the AMD group and both the YH and OH groups; but not  
 222 between the YH and OH groups.

223 **Vessel density measurements: SCP Segment.**

224 *Table 2: Mean Vessel Density in superficial capillary plexus (SCP) defined in sectors based on the*  
 225 *ETDRS chart (Foveal, Superior, Nasal, Inferior, and Temporal).*

|                          |              |                  |                  |                  |                    |                  |
|--------------------------|--------------|------------------|------------------|------------------|--------------------|------------------|
| <b>Young<br/>Healthy</b> |              | <b>27.0±12.9</b> | <b>62.3±23.1</b> | <b>60.0±20.1</b> | <b>64.8±21.5</b>   | <b>59.9±21.2</b> |
| ETDRS<br>n=20<br>Sectors | Foveal % (1) |                  | Superior % (2)   | Nasal % (3)      | Inferior % (4)     | Temporal % (5)   |
| Old                      |              |                  |                  |                  |                    |                  |
| Young<br>Healthy         |              | <b>35.9±20.3</b> | <b>57.1±19.9</b> | <b>56.3±22.6</b> | <b>56.6 ± 22.1</b> | <b>54.1±24.8</b> |
| Healthy<br>n=21          | 19.8±3.3     |                  | 25.0±4.7         | 24.5±4.2         | 27.8±4.8           | 25.5±4.8         |
| AMD<br>n=20              |              | <b>43.8±31.6</b> | <b>55.0±44</b>   | <b>53.9±41.1</b> | <b>62.0±50.1</b>   | <b>55.6±40.6</b> |
| Old<br>n=34              |              |                  |                  |                  |                    |                  |
| Healthy<br>n=21          | 21.3±3.9     |                  | 25.9±3.5         | 25.7 ± 4.1       | 26.7.±4.9          | 24.6.±5.0        |

226

227 Table 2 shows the mean VD of the SCP segment within each ETDRS sector in each group.

228 Although, there was a trend towards the mean vessel density derived from the SCP in all ETDRS

229 sectors being higher in the AMD cohort compared to the 2 healthy cohorts, no significant

230 difference was found in the VD's recorded in any of the 5 ETDRS sectors between the 3 cohorts.

231 **Vessel density measurements: DCP Segment.**

232 *Table 3: Mean Vessel Density in deep capillary plexus (DCP) defined in sectors based on the*  
 233 *ETDRS chart (Foveal, Superior, Nasal, Inferior, and Temporal).*

|       |              |                |             |                |                |
|-------|--------------|----------------|-------------|----------------|----------------|
| AMD   | 25.4 ±7.9    | 30.4±10.5      | 30.7±11.1   | 32.5±11.0      | 32.0±8.5       |
| ETDRS | Foveal ratio | Superior ratio | Nasal ratio | Inferior ratio | Temporal ratio |

234

235 Table 3 shows the mean VD of the DCP segment within each ETDRS sector for all groups.

236 The mean VD was found to be significantly higher (<0.01) in the DCP than the SCP in all ETDRS  
237 sectors and in all groups. Although, there was a trend towards the mean vessel density derived  
238 from the DCP in ETDRS sector 1 being higher in the AMD cohort compared to the 2 “healthy”  
239 cohorts, the difference was not statistically significant. There was a trend for the mean vessel  
240 density derived from the DCP in the remaining ETDRS sectors; 2-5, to be higher in the YH cohort  
241 compared to the other 2 cohorts, this difference was not statistically significant.

242

243 **Vessel density measurements: Choriocapillaris Segment.**

244

245 *Table 4: Mean Vessel Density in the choriocapillaris, based on the ETDRS chart (Foveal, Superior,*  
246 *Nasal, Inferior, and Temporal)*

| S<br>Sector<br>s             | (1)         | (2)         | (3)         | (4)         | (5)         |
|------------------------------|-------------|-------------|-------------|-------------|-------------|
| Young<br>Health<br>y<br>n=20 | 97 ± 10.5   | 86.2 ± 10.7 | 90.8 ± 11   | 103.8 ± 9.8 | 103 ± 11.3  |
| Old<br>Health<br>y<br>n=21   | 97 ± 4.5    | 85.5 ± 8.5  | 83.9 ± 9.5  | 86.3 ± 10.5 | 80.1 ± 12.8 |
| AMD<br>n=34                  | 71.4 ± 24.3 | 68.1 ± 23.8 | 69.7 ± 24.4 | 68.4 ± 22.7 | 73.1 ± 19.4 |

247

248 Table 4 shows the mean VD of the Choriocapillaris segment within each ETDRS sector for all  
 249 groups. In contrast to the measurements recorded in the retinal segments, statistically  
 250 significantly lower mean VD's were recorded in the choriocapillaris segment layer in the AMD  
 251 group across all ETDRS sectors compared to the two healthy groups. There was no significant  
 252 difference in the VD's measured in each of the ETDRS sectors between YH and the OH groups.

## 253 **Discussion**

254 Although a number of changes within the ageing macular have previously been reported, a  
255 reliable, non-invasive biomarker of both “healthy” macular ageing and disease risk remains  
256 elusive. Retinal thickness, both at the fovea and extra-foveal regions, has previously been shown  
257 to differ significantly between individuals with early AMD and age-matched controls with the  
258 retina being thinner in individuals with disease<sup>16</sup>. The results of our study also revealed that there  
259 was a trend for the overall retinal thickness to thin with age but this difference was not  
260 statistically significant between cohorts. It is also recognised that the choroid tends to thin with  
261 age; with the nasal area being thinnest, and the subfoveal region being thickest<sup>17</sup>. In addition to  
262 thinning with “normal ageing,” Choroidal thinning has also been demonstrated in individuals with  
263 early AMD compared to age matched controls<sup>16, 18-20</sup> however, the significance of this  
264 observation is controversial as both the extent and the pattern of thinning is significant in some<sup>20</sup>  
265 but not all studies<sup>16,18,19</sup>. The histological evidence regarding choroidal thickness is also  
266 contradictory with some studies showing reduction in late AMD<sup>21</sup> and others showing no  
267 change<sup>19</sup>; moreover, the changes in the vasculature of the choriocapillaris in early AMD that  
268 have been reported from histological studies<sup>19,21</sup> appear to be independent of choroidal  
269 thickness.

270 Similarly inconclusive observations have been reported with respect to the width of the Foveal  
271 avascular zone with age. Whilst some studies report no difference with age<sup>22, 23</sup> others have  
272 found that the FAZ enlarges with increasing age<sup>24, 25</sup>. Where reported, the FA at the level of the  
273 SCP has been found to be significantly smaller in >60 year olds compared to younger study  
274 groups<sup>14</sup>, but the significance of this difference is unknown and furthermore no difference was  
275 observed when the FAZ at the level of the DCP was analysed<sup>14</sup>. Recently, a study studying the  
276 FAZ in patients with intermediate non-exudative AMD found no significant difference in the width  
277 of the FAZ between patients with non-exudative AMD and healthy controls<sup>26</sup>. We likewise found  
278 there to be no statistically significant difference in the diameter of the FAZ between any of the 3  
279 cohorts studied.

280 Where objective measures of macular anatomy have failed, OCTA may provide an opportunity to  
281 develop a reliable, non-invasive vascular biomarker of the ageing macular. The proprietary

282 OCTA software now has a vessel density function which, in brief uses the proportion of bright  
283 pixels to the proportion of dark pixels to derive a measure of vascular density. In the first instance  
284 we reviewed the mean vessel density percentage throughout the **full** retinal thickness, for each  
285 ETDRS sector. We then used the **segmentation** function of the enface OCTA to explore the  
286 relationship of the vessel densities within each of the ETDRS sectors 1-5 in each of the 3  
287 vascular zones of the central macular; (SCP, DCP, Choriocapillaris) across the 3 cohorts; YH,  
288 OH and AMD.

289 As one might expect the VD's derived from the relatively avascular ETDRS sector 1 were, in the  
290 **full** thickness maps, significantly reduced compared to the VD's derived from ETDRS sectors 2-5  
291 in the YH, OH, and AMD cohorts. However, and curiously, the VD recorded in the AMD cohort  
292 was significantly higher than in the two "Healthy" cohorts, and whilst there was a trend for the  
293 VD's derived from the YH cohort to be reduced compared to the OH cohort, this difference was  
294 not significant. Aside the marked difference between the AMD cohort and the other two "healthy"  
295 cohorts, no other clinically relevant or statistically significant patterns were noted in the VD's  
296 derived from the full thickness retinal maps.

297 Overall, and when the retinal vascular complexes were analysed as separate segments, the  
298 highest vessel densities were found in sectors 2 and 4; the superior and inferior macula. Again  
299 the VDs derived from ETDRS sector 1 was greater in the AMD cohort compared to the two  
300 "Healthy" cohorts. Whilst there was a trend for the VD's derived from the OH cohort to be lower  
301 compared to the YH cohort, this difference was not significant. The spatial variation in VD's that  
302 we observed; a higher mean VD in the inferior and superior EDTRS sectors and a lower mean  
303 VD in the temporal and nasal sectors, in both the deep and superficial capillary plexi, is  
304 consistent with published data from previous studies.<sup>14, 22, 23</sup> Like others<sup>14, 27</sup>, we also observed  
305 that in all ETDRS sectors and in all 3 study groups, the mean VD derived from the DCP was  
306 significantly higher than that derived from the SCP.

307 The association between age and vessel density remains unclear, with reports of statistically  
308 significant lower mean vessel density in SCP, DCP and full thickness of retina in each ETDRS  
309 sector in patients >60 years old compared to younger cohorts;<sup>14</sup>, however, others who have  
310 studied this have found no such correlation<sup>22</sup>. On the whole, our results do not further our



311 understanding of VD changes with age, being similarly inconclusive. On the basis of these data,  
312 one has to conclude that without further work, VD's derived from the retinal segments are not a  
313 reliable biomarker for "healthy" ageing.

314 One consistent feature of the VD's derived from the retinal segments in the present study was  
315 the finding that the VD's recorded from ETDRS sector 1, and indeed in many other ETDRS  
316 sectors in the AMD cohort, were as a group consistently higher than those obtained from the  
317 "healthy" cohorts. One possible explanation for this surprising result is the technical challenges of  
318 obtaining high quality OCT-A scans from individuals with even modest visual impairment as  
319 accurate central fixation during the OCT-A capture can be challenging. Many of the patients in  
320 our AMD cohort struggled to maintain fixation during the image acquisition stage, despite the  
321 majority recording a Snellen acuity of 6/12. . Increased acquisition time and the resultant  
322 compromise in image quality means there is a higher likelihood of projection and banding  
323 artefacts.<sup>28</sup> Motion artefacts can also lead to the duplication of inner retinal vascular structures  
324 <sup>29</sup>.As vessel density is derived from the percentage of the area occupied by bright pixels in a  
325 segmented area, errors such as vessel duplication and banding artefacts could be incorrectly  
326 interpreted during computational analysis as increased vessel density within the image. Such an  
327 error would be magnified in ETDRS sector 1 where the effects of these banding and motion  
328 artefacts would be more pronounced in what should be avascular tissue.

329 Although the proprietary OCTA software to assess VD is designed to measure the inner retinal  
330 plexi, a vascular bed which has a very different architecture to the choriocapillaris<sup>30</sup> we were  
331 curious to know whether the principle of VD analysis could be used to assess the vascularity of  
332 the choriocapillaris. We therefore extracted the raw data, and then used a manual analysis  
333 method previously published in the literature<sup>15</sup>, to assess the "Vascular density" of the  
334 choriocapillaris segment. Even allowing for the influence of banding and motion artefacts,  
335 issues which should increase VD measurements, we observed a significant reduction in the VD  
336 in both the AMD and OH cohorts compared to the YH cohort with the reduction in VD being most  
337 marked in the AMD cohort (Table 4). This contrasts sharply with the data derived from the retinal  
338 plexi which broadly showed no difference between groups. Although interesting, one has to  
339 interpret these findings with caution. It is possible that the observed reduction in VD is simply a

340 result of increased projection artefact and as VD has, to the best of our knowledge, not  
341 previously been used to assess the choriocapillaris, it is not possible to corroborate these  
342 findings. However, a global reduction in choriocapillaris density, associated with drusen on OCT-  
343 A in dry AMD has been demonstrated previously.<sup>6</sup> It is also recognised that the inner choroid and  
344 the choriocapillaris disproportionately thin with age and disease<sup>31</sup>. It is feasible that a thinning  
345 choriocapillaris would be less vascular and other groups have hypothesised that choroidal  
346 perfusion changes on the OCT-A, may predict disease progression<sup>6</sup>. Debate about whether this  
347 is related to actual flow impairment<sup>6</sup> or projection artefact “masking” the choriocapillaris<sup>29, 32</sup> due  
348 to large drusen or pigment epithelial detachments attenuating the OCT-A signal is still ongoing.  
349 Without further corroborative work, the importance of our finding that there is a progressive  
350 reduction in choriocapillaris VD in age and disease is difficult to assess. Furthermore, because  
351 our old healthy group and AMD cohorts are not aged matched, it is not possible to comment on  
352 whether any observed reduction is simply an ageing phenomenon or a marker of disease.  
353 Nevertheless, if reproducible, such a measure has the potential to provide a non-invasive  
354 biomarker of both “healthy” macular ageing and disease risk. Further limitations of this study  
355 include a small sample size, which might reduce the generalisability of our findings and the  
356 interpretation of the statistical significance of our data. Furthermore, the Kolmogorov and  
357 Smirnov statistical test assumes the Gaussian distribution of the tested data.

358

### 359 **Conclusion**

360

361 OCT-A mean retinal vessel density results for normal subjects are in line with the existing  
362 literature. Challenges of image acquisition and the significant influence of image artefact on post-  
363 acquisition analysis of patients with mild visual loss due to intermediate age related macular  
364 degeneration further limits the value of VD measurements in this patient group. Traditional  
365 measures of vessel density, derived from the retinal plexi are therefore unreliable biomarkers for  
366 both “healthy” ageing and quantifying risk of developing AMD. Our non-proprietary analysis of  
367 the vascular density of the choriocapillaris revealed a significant drop off of VD with age and

368 disease but further work is required to corroborate this finding. If repeatable choriocapillaris VD  
369 may provide a non-invasive biomarker of healthy ageing and disease.

370

371 **Acknowledgments**

372 The authors wish to acknowledge the assistance by Mr Diego Sonderegger, from Device  
373 Technologies®.

374

## 375 **References**

- 376 1. Spaide RF, Fujimoto JG, Waheed NK, Sadda SR, Staurengi G. Optical coherence  
377 tomography angiography. *Prog Retin Eye Res* 2018;64:1-55.
- 378 2. Rabiolo A, Gelormini F, Sacconi R, et al. Comparison of methods to quantify macular  
379 and peripapillary vessel density in optical coherence tomography angiography. *PLoS One*  
380 2018;13:e0205773.
- 381 3. Spaide RF, Klancnik JM, Jr., Cooney MJ. Retinal vascular layers imaged by  
382 fluorescein angiography and optical coherence tomography angiography. *JAMA Ophthalmol*  
383 2015;133:45-50.
- 384 4. Tan PE, Yu PK, Balaratnasingam C, et al. Quantitative confocal imaging of the retinal  
385 microvasculature in the human retina. *Invest Ophthalmol Vis Sci* 2012;53:5728-5736.
- 386 5. Gariano RF, Iruela-Arispe ML, Hendrickson AE. Vascular development in primate  
387 retina: comparison of lamellar plexus formation in monkey and human. *Invest Ophthalmol Vis*  
388 *Sci* 1994;35:3442-3455.
- 389 6. de Carlo TE, Romano A, Waheed NK, Duker JS. A review of optical coherence  
390 tomography angiography (OCTA). *Int J Retina Vitreous* 2015;1:5.
- 391 7. Reif R, Qin J, An L, Zhi Z, Dziennis S, Wang R. Quantifying optical  
392 microangiography images obtained from a spectral domain optical coherence tomography  
393 system. *Int J Biomed Imaging* 2012;2012:509783.
- 394 8. Jia Y, Bailey ST, Hwang TS, et al. Quantitative optical coherence tomography  
395 angiography of vascular abnormalities in the living human eye. *Proc Natl Acad Sci U S A*  
396 2015;112:E2395-2402.
- 397 9. Chalam KV, Sambhav K. Optical Coherence Tomography Angiography in Retinal  
398 Diseases. *J Ophthalmic Vis Res* 2016;11:84-92.
- 399 10. Pichi F, Nucci P, Baynes K, Lowder CY, Srivastava SK. Sustained-release  
400 dexamethasone intravitreal implant in juvenile idiopathic arthritis-related uveitis. *Int*  
401 *Ophthalmol* 2017;37:221-228.
- 402 11. Agemy SA, Sripsema NK, Shah CM, et al. Retinal Vascular Perfusion Density  
403 Mapping Using Optical Coherence Tomography Angiography in Normals and Diabetic  
404 Retinopathy Patients. *Retina* 2015;35:2353-2363.
- 405 12. Chu Z, Lin J, Gao C, et al. Quantitative assessment of the retinal microvasculature  
406 using optical coherence tomography angiography. *J Biomed Opt* 2016;21:66008.
- 407 13. Zhang A ZQ, Chen CL, Wang RK. Methods and algorithms for optical coherence  
408 tomography-based angiography: a review and comparison. *J Biomed Opt* 2015;20:100901.
- 409 14. Coscas F, Sellam A, Glacet-Bernard A, et al. Normative Data for Vascular Density in  
410 Superficial and Deep Capillary Plexuses of Healthy Adults Assessed by Optical Coherence  
411 Tomography Angiography. *Invest Ophthalmol Vis Sci* 2016;57:OCT211-223.
- 412 15. Hirano T, Chanwimol K, Weichsel J, Tepelus T, Sadda S. Distinct Retinal Capillary  
413 Plexuses in Normal Eyes as Observed in Optical Coherence Tomography Angiography Axial  
414 Profile Analysis. *Sci Rep* 2018;8:9380.
- 415 16. Wood A, Binns A, Margrain T, et al. Retinal and choroidal thickness in early age-  
416 related macular degeneration. *Am J Ophthalmol* 2011;152:1030-1038 e1032.
- 417 17. MANJUNATH V TM, FUJIMOTO JG, DUKER JS. Choroidal Thickness in Normal  
418 Eyes Measured Using Cirrus HD Optical Coherence Tomography. *Am J Ophthalmol*  
419 2010;150:325-329.
- 420 18. Chung SE, Kang SW, Lee JH, Kim YT. Choroidal thickness in polypoidal choroidal  
421 vasculopathy and exudative age-related macular degeneration. *Ophthalmology* 2011;118:840-  
422 845.

- 423 19. Ramrattan RS, van der Schaft TL, Mooy CM, de Bruijn WC, Mulder PG, de Jong PT.  
424 Morphometric analysis of Bruch's membrane, the choriocapillaris, and the choroid in aging.  
425 *Invest Ophthalmol Vis Sci* 1994;35:2857-2864.
- 426 20. Sigler EJ, Randolph JC. Comparison of macular choroidal thickness among patients  
427 older than age 65 with early atrophic age-related macular degeneration and normals. *Invest*  
428 *Ophthalmol Vis Sci* 2013;54:6307-6313.
- 429 21. Sarks SH. Ageing and degeneration in the macular region: a clinico-pathological  
430 study. *Br J Ophthalmol* 1976;60:324-341.
- 431 22. Rosen RK, B; Mo, S; Geyman, L; Phillips, E; Carroll, J; Weitz, R; Chui, TYP. Age-  
432 Related Variations in Foveal Avascular Zone Geometry and Vessel Density - an Optical  
433 Coherence Tomography Angiography (OCTA) study. *Invest Ophthalmol Vis Sci* September  
434 2016;57:5501.
- 435 23. Gadde SG, Anegondi N, Bhanushali D, et al. Quantification of Vessel Density in  
436 Retinal Optical Coherence Tomography Angiography Images Using Local Fractal  
437 Dimension. *Invest Ophthalmol Vis Sci* 2016;57:246-252.
- 438 24. Iafe NA, Phasukkijwatana N, Chen X, Sarraf D. Retinal Capillary Density and Foveal  
439 Avascular Zone Area Are Age-Dependent: Quantitative Analysis Using Optical Coherence  
440 Tomography Angiography. *Invest Ophthalmol Vis Sci* 2016;57:5780-5787.
- 441 25. Falavarjani KG, Shenazandi H, Naseri D, et al. Foveal Avascular Zone and Vessel  
442 Density in Healthy Subjects: An Optical Coherence Tomography Angiography Study. *J*  
443 *Ophthalmic Vis Res* 2018;13:260-265.
- 444 26. Stavrev V, Sivkova N, Koleva-Georgieva D. Quantitative Assessment of Foveal  
445 Avascular Zone in Patients with Early and Intermediate Nonexudative Age-Related Macular  
446 Degeneration Using Optical Coherence Tomography-Angiography %J Open Journal of  
447 Ophthalmology. 2018;Vol.08No.03:7.
- 448 27. Shahlaee A, Samara WA, Hsu J, et al. In Vivo Assessment of Macular Vascular  
449 Density in Healthy Human Eyes Using Optical Coherence Tomography Angiography. *Am J*  
450 *Ophthalmol* 2016;165:39-46.
- 451 28. Al-Sheikh M, Ghasemi Falavarjani K, Akil H, Sadda SR. Impact of image quality on  
452 OCT angiography based quantitative measurements. *Int J Retina Vitreous* 2017;3:13.
- 453 29. Chen FK, Viljoen RD, Bukowska DM. Classification of image artefacts in optical  
454 coherence tomography angiography of the choroid in macular diseases. *Clin Exp Ophthalmol*  
455 2016;44:388-399.
- 456 30. Spaide RF. Choriocapillaris flow features follow a power law distribution:  
457 implications for characterization and mechanisms of disease progression. *American journal*  
458 *of ophthalmology* 2016;170:58-67.
- 459 31. Esmaeelpour M, Kajib V, Zabihian B, et al. Choroidal Haller's and Sattler's layer  
460 thickness measurement using 3-dimensional 1060-nm optical coherence tomography. *PLoS*  
461 *one* 2014;9:e99690.
- 462 32. Spaide RF, Fujimoto JG, Waheed NK. Image Artifacts in Optical Coherence  
463 Tomography Angiography. *Retina* 2015;35:2163-2180.
- 464

465

466 **Figure Legend**

467 **Figure 1: Retinal layers were automatically identified by IMAGENET 6 software (A) the SCP and**  
468 **DCP were then isolated from layers 1 and 2, and 3 and 4 respectively. ETDRS regions 1-9 are**  
469 **superimposed onto the enface OCT-A images and manually adjusted so that sector 1 was**  
470 **centred on the fovea. In this study we selected sectors 1-5 (B).**

**A**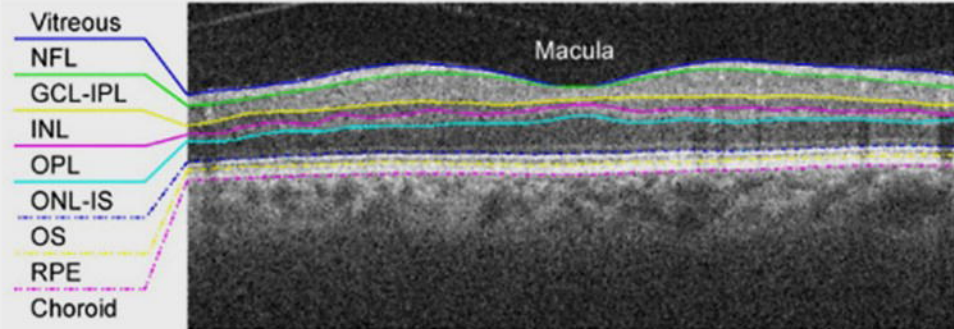

NFL: Nerve Fiber Layer  
GCL: Ganglion Cell Layer  
IPL: Inner Plexiform Layer  
INL: Inner Nuclear Layer  
OPL: Outer Plexiform Layer

ONL: Outer Nuclear Layer  
IS: Inner Segment  
OS: Outer Segment  
RPE: Retinal Pigment Epithelium

**B**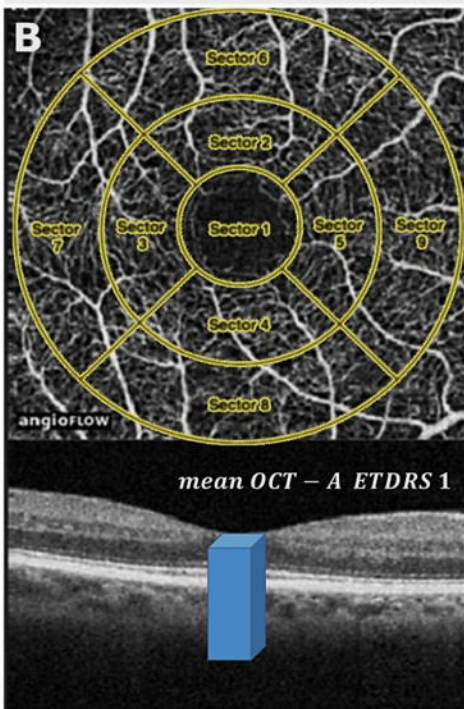

Source: https://medrxiv.org/content/medrxiv/early/2019/07/25/19003053.full.pdf
